# Supplementary material
Source: PubMed Central journal article supplement (PMC4805659)
Supplement: thnov06p0638s1.pdf [file thnov06p0638s1.pdf]

**Supplementary Table S1.** Primer sequences and PCR conditions

| PCR fragment | Primer sequence               | Size (bp) | Annealing temperature (°C) |
|--------------|-------------------------------|-----------|----------------------------|
| Exon1F       | 5'-CTCTCCCCTCACGCTCTCATC-3'   | 473       | 62                         |
| Exon1R       | 5'-TTTTCTCCCACGCCAAGACATCC-3' |           |                            |
| Exon2.1F     | 5'-AGAGAAGCTGGGATGTTGTAG-3'   | 490       | 62                         |
| Exon2.1R     | 5'-AGATAAGGCTGATAAGTGATGAC-3' |           |                            |
| Exon2.2F     | 5'-GTCCTGTGTCAGCTCCATTG-3'    | 552       | 62                         |
| Exon2.2R     | 5'-CTGTGATCTGTCCCACTCCC-3'    |           |                            |
| Exon2.3F     | 5'-CTGCCCAAGTAAAGTATGACCC-3'  | 526       | 58                         |
| Exon2.3R     | 5'-CAGGATTTTGTCCACTGTTGAC-3'  |           |                            |
| Exon4F       | 5'-AGCAAGCCTCATGTGCAGCCTC-3'  | 435       | 68                         |
| Exon4R       | 5'-ACAACAAACCAGACACGTCCAAG-3' |           |                            |
| Exon16F      | 5'-CAGAATGGTTAAAAGGATAT-3'    | 298       | 58                         |
| Exon16R      | 5'-GCAGAAAACGTATTTCTGAG-3'    |           |                            |
| Exon18F      | 5'-AGGGTAACTTGAGGTTTCTG-3'    | 374       | 60                         |
| Exon18R      | 5'-ATCCAGCAAATCATTCTGATG-3'   |           |                            |

Abbreviations: F, forward; R, reverse.
